# Supplementary material for: Investigating the electronic properties of novel titanium oxonitridophosphate, Ti5P12N24O2, through structural distortions at the titanium sites
Source: Royal Society of Chemistry journal article supplement (doi:10.1039/d4tc00248b), 2024-01-01
Supplement: d4tc00248b1.pdf [file d4tc00248b1.pdf]

## Supplementary information: Investigating the electronic properties of novel Titanium Oxonitridophosphate, $\text{Ti}_5\text{P}_{12}\text{N}_{24}\text{O}_2$ , through structural distortions at the Titanium sites

Peter Ufondu,<sup>1,\*</sup> Teak D. Boyko,<sup>2</sup> Monika M. Pointner,<sup>3</sup> Lucien Eisenburger,<sup>3</sup> Wolfgang Schnick,<sup>3</sup> and Alexander Moewes<sup>1</sup>

<sup>1</sup>Department of Physics and Engineering Physics, University of Saskatchewan,  
116 Science Place, Saskatoon S7N 5E2, Saskatchewan, Canada

<sup>2</sup>Canadian Light Source, 44 Innovation Blvd, Saskatoon, S7N 2V3, Saskatchewan, Canada

<sup>3</sup>Department of Chemistry, University of Munich (LMU) Butenandtstraße 5–13, 81377 Munich, Germany

### I. CRYSTAL FIELD PARAMETER ( $10Dq$ , $Ds$ , $Dt$ )

Fig. S1 shows the experimental Resonant Inelastic X-ray Scattering (RIXS) spectrum of the titanium oxonitridophosphate compound  $\text{Ti}_5\text{P}_{12}\text{N}_{24}\text{O}_2$ . The initial energy values for crystal field parameters, namely  $10Dq$ ,  $Ds$ , and  $Dt$ , were achieved through analysis of the experimental RIXS spectrum of  $\text{Ti}_5\text{P}_{12}\text{N}_{24}\text{O}_2$ . Notably, the  $\Delta_{t2g}$  was identified to be at 0 eV, attributed to a convolution in the elastic peak, while the energy splitting for the  $eg$  orbitals,  $\Delta_{eg}$ , was found to be 1.4 eV. The energy difference between the elastic peak and the first inelastic feature, representing  $10Dq$ , was determined to be 0.4 eV.

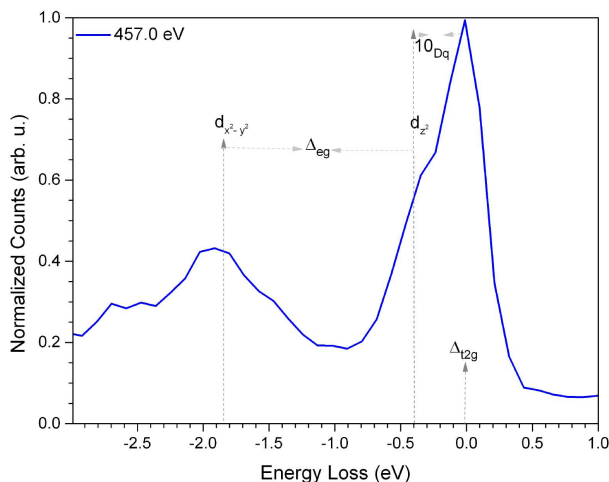

FIG. S1: Figure S1 is the measured RIXS spectrum showing the distortion parameter  $10Dq$  and the energy gap  $\Delta_{eg}$  and  $\Delta_{t2g}$  orbitals of  $\text{Ti}_5\text{P}_{12}\text{N}_{24}\text{O}_2$ .

$$d_{x^2-y^2} = 6 \times 10Dq + 2 \times Ds - Dt, \quad (\text{S1})$$

$$d_{z^2} = 6 \times 10Dq - 2 \times Ds - 6 \times Dt, \quad (\text{S2})$$

S1 - S2 = S3

$$\Delta_{eg} = 4 \times Ds + 5 \times Dt, \quad (\text{S3})$$

$$d_{xy} = -4 \times 10Dq + 2 \times Ds - Dt, \quad (\text{S4})$$

\*Electronic address: peter.ufondu@usask.ca

$$d_{xz,yz} = -4 \times 10Dq - Ds + 4 \times Dt. \quad (\text{S5})$$

$$S4 - S5 = S6$$

$$\Delta_{t2g} = 3 \times Ds - 5 \times Dt, \quad (\text{S6})$$

$$Ds = 0.20 \quad (\text{S7})$$

$$Dt = 0.12 \quad (\text{S8})$$

Utilizing these parameters and solving the equations S3 and S6 simultaneously, we obtain the values of  $Ds$  and  $Dt$  to be 0.20 eV and 0.12 eV, respectively.

## II. DETERMINING SPLITTING ENERGIES: CALCULATION METHODOLOGIES

The following parameters  $V_{b1g}$ ,  $V_{a1g}$ ,  $V_{b2g}$  and  $V_{eg}$  are used to represent the 3d-orbital energy level for  $D_{4h}$  symmetry. The Hamiltonian[1–3] for the system is set up in the Lua script for Quanta[4–7], incorporating terms for the crystal field, spin-orbit coupling, electron-electron interactions, and hybridization parameters.

A Python script performs parameter fitting by adjusting the hybridization parameters (among others) to fit the calculated and measured spectra. This process involves multiple steps such as running Quanta simulations with initial guesses for the parameters, comparing the simulated XAS and RIXS spectra to experimental spectra, and using optimization Powell fitting algorithm[8] to adjust all the variable parameters iteratively, minimizing the difference between theoretical and experimental spectra. This process involves analyzing the spectral features such as peak positions, intensities, and shapes to ensure that the model accurately reflects experimental observations.

The fitting process is inherently iterative, requiring multiple simulations with Quanta, each time adjusting the parameters based on the outcome of the previous fit. The ultimate goal is to minimize the discrepancy between the calculated and experimental spectra within acceptable limits.

Upon optimizing the fitting parameters, we calculate the corresponding splitting energy of the  $e_g$  orbitals  $\Delta_{eg}$  and  $t_{2g}$  orbitals  $\Delta_{t2g}$  as shown in equation S3 and equation S6 respectively.

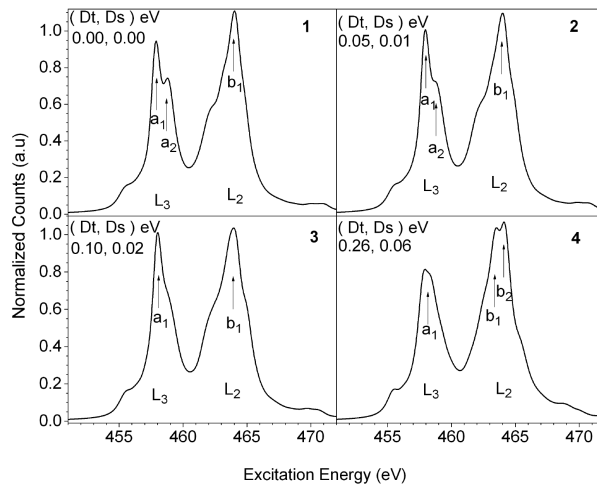

FIG. S2: Figure S2 (1-4) shows the impact of the increasing distortion parameters  $Ds$  and  $Dt$  on  $Ti_5P_{12}N_{24}O_2$  XAS spectra. “ $a_n$ ” and “ $b_n$ ” represent features on the  $L_3$  and  $L_2$ -edge. Increasing the energy values  $Ds$  and  $Dt$ , the enhanced  $L_3$  ( $a_2$ ) feature in (1) becomes broaden and reduced in intensity, whereas in (4) a new feature ( $b_2$ ) emerges in the  $L_2$ -edge.

[1] M. Matsubara, T. Uozumi, A. Kotani, and J. Claude Parlebas, Journal of the Physical Society of Japan **74**, 2052 (2005).

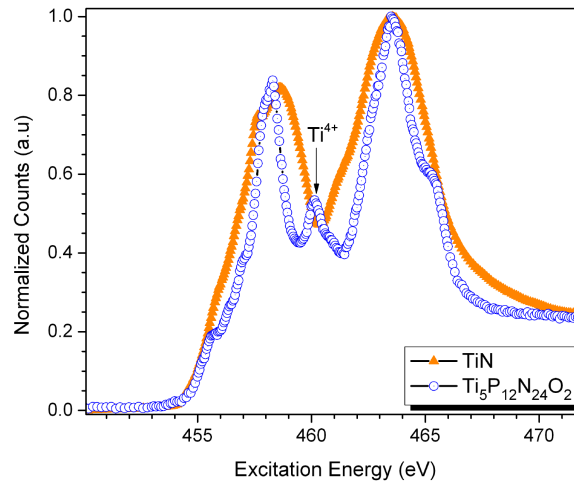

FIG. S3: Figure S3 shows an overlay of  $Ti_5P_{12}N_{24}O_2$  (blue circle) and  $TiN$  (orange triangle) XAS spectra.

- [2] B. C. J., McGraw-Hill Book Company, inc. New York (1962).
- [3] R. J. Green, M. W. Haverkort, and G. A. Sawatzky, *Phys. Rev. B* **94**, 195127 (2016), URL <https://link.aps.org/doi/10.1103/PhysRevB.94.195127>.
- [4] M. W. Haverkort, M. Zwierzycki, and O. K. Andersen, *Phys. Rev. B* **85**, 165113 (2012), URL <https://link.aps.org/doi/10.1103/PhysRevB.85.165113>.
- [5] Y. Lu, M. Höppner, O. Gunnarsson, and M. W. Haverkort, *Phys. Rev. B* **90**, 085102 (2014), URL <https://link.aps.org/doi/10.1103/PhysRevB.90.085102>.
- [6] M. W. Haverkort, G. Sangiovanni, P. Hansmann, A. Toschi, Y. Lu, and S. Macke, *Europhysics Letters* **108**, 57004 (2014), URL <https://dx.doi.org/10.1209/0295-5075/108/57004>.
- [7] M. W. Haverkort, *Journal of Physics: Conference Series* **712**, 012001 (2016), URL <https://dx.doi.org/10.1088/1742-6596/712/1/012001>.
- [8] M. J. D. Powell, *The Computer Journal* **7**, 155 (1964), ISSN 0010-4620, URL <https://doi.org/10.1093/comjnl/7.2.155>.
